# Supplementary material for: Plasma Lipidomic Patterns in Patients with Symptomatic Coronary Microvascular Dysfunction
Source: MDPI journal article supplement (doi:10.3390/metabo11100648), 2021-09-22
Supplement: s1 [file s1]

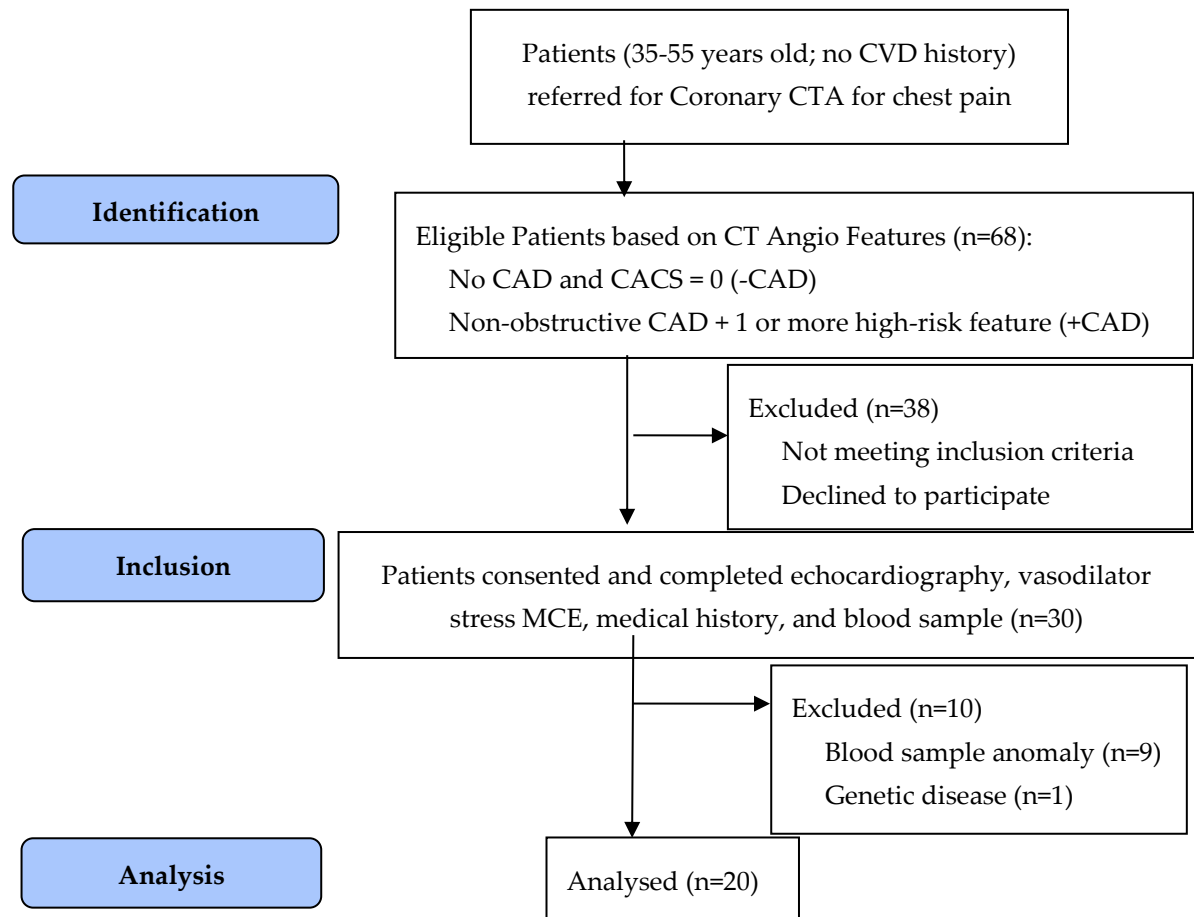

**Supplemental Figure S1.** Study enrollment flow chart. STROBE, Strengthening the Reporting of Observational Studies in Epidemiology. CACS, coronary artery calcium score; CAD, coronary artery disease; CVD, cardiovascular disease; MCE, myocardial contrast echocardiography
